# Supplementary material for: Transposon insertional mutagenesis in Saccharomyces uvarum reveals trans-acting effects influencing species-dependent essential genes
Source: PubMed Central journal article supplement — Genome Res. 2019 Mar;29(3):396–406. doi: 10.1101/gr.232330.117 (PMC6396416; doi:10.1101/gr.232330.117), 2019-03
Supplement: supp_gr.232330.117_Supplemental_Material.pdf [file supp_gr.232330.117_Supplemental_Material.pdf]

1 SUPPLEMENTAL MATERIALS

2  
3 **Transposon insertional mutagenesis in *Saccharomyces uvarum* reveals trans-**  
4 **acting effects influencing species-dependent essential genes**

5  
6 **Sanchez et. al**

7  
8  
9 **TABLE OF CONTENTS**

10  
11 **FIGURES**

12 **Supplemental Fig. S1.** Distribution of haploid and diploid Tn7 insertions across the *S.*  
13 *uvarum* genome.

14 **Supplemental Fig. 2.** Proportional Venn diagram summarizing the number of insert-  
15 containing genes identified in each library.

16 **Supplemental Fig. S3.** Comparison of insertion distributions between haploid and  
17 diploid libraries amongst known *S. cerevisiae* essential and non-essential genes.

18 **Supplemental Fig. S4.** Conservation comparison between *S. cerevisiae*, *S. pombe* and  
19 predicted *S. uvarum* essential genes.

20 **Supplemental Fig. S5.** Confirmatory tetrad analysis for conserved, predicted essential  
21 genes.

22 **Supplemental Fig. S6.** Confirmatory tetrad analysis for conserved, predicted non-  
23 essential genes.

- 1 **Supplemental Fig. S7.** Orthologous gene comparisons between species.
- 2 **Supplemental Fig. S8.** Network analysis of conserved essential genes across diverged  
3 species.
- 4 **Supplemental Fig. S9.** Confirmatory tetrad analysis for predicted *S. uvarum*-specific  
5 essential genes.
- 6 **Supplemental Fig. S10.** Confirmed tetrad analysis for predicted *S. cerevisiae*-specific  
7 essential genes.
- 8 **Supplemental Fig. S11.** Confirmatory tetrad analysis in *S. uvarum* for all conserved  
9 essential and non-essential genes.
- 10 **Supplemental Fig. S12.** Incorrect gene annotation of *DRE2*.
- 11 **Supplemental Fig. S13.** Differential gene expression alone cannot explain difference in  
12 gene dispensability.
- 13
- 14 **TABLES**
- 15 **Supplemental Table S1.** List of yeast strains used in this study.
- 16 **Supplemental Table S2.** List of plasmids used in this study.
- 17 **Supplemental Table S3.** List of primers used in this study.
- 18 **Supplemental Table S4.** Summary of sequence read coverage for each library.
- 19 **Supplemental Table S5.** List of *S. uvarum* coding coordinates containing insertion  
20 counts from each library.
- 21 **Supplemental Table S6.** GO analysis on essential genes.
- 22 **Supplemental Table S7.** GO analysis on non-essential genes.
- 23 **Supplemental Table S8.** List of orthologous coding coordinates containing insertion  
24 counts from each library.
- 25 **Supplemental Table S9.** List of genes that are predicted to differ in dispensability  
26 between species.

1 **Supplemental Table S10.** List of GO enrichment of molecular function terms for each  
2 species-specific gene.

3 **Supplemental Table S11.** Summary of library coverage.

4 **Supplemental Table S12.** Summary of validations.

5

6 **CODE**

7 **Supplemental\_Code.rb.** Script used to call insertion positions

8

## 1 **Generating Tn7 insertional libraries in *S. uvarum***

2 The plasmid library containing ligated *S. uvarum* genomic DNA with Tn7  
3 insertion sites contains ~50,000 unique genomic insertion sites that were integrated into a  
4 diploid and a haploid *MATa* strain (Figure 1B). We isolated mutants with the ClonNat  
5 resistance marker on plates and created a final diploid pool of ~500,000 (10X coverage of  
6 plasmid library) transformants (Figure 1B). The haploid pool was obtained from the  
7 Caudy lab containing ~300,000 transformants. We added an additional 200,000  
8 transformants to the haploid pool to increase the total coverage.

## 9 **Distribution of insertion sites across the *S. uvarum* genome**

10 We first sequenced the plasmid pool of *S. uvarum* mutants to determine the  
11 genome coverage of genes containing insertion sites in the original plasmid library. We  
12 sequenced the library by extracting plasmid DNA and enriching for fragments of DNA  
13 containing the Tn7 sequence. Primers were designed to target the Tn7 sequence and the  
14 Illumina linker sequences that were ligated to randomly sheared plasmid DNA (Figure  
15 1C). The PCR amplicons of the Tn7 library were sequenced, trimmed, mapped and  
16 processed through an in-house Ruby script to determine the position of the insertion site  
17 (Material and Methods). Insertion sites with fewer than 10 reads were filtered out.  
18 Detailed information about overall sequencing coverage is listed in **Supplemental Table**  
19 **S4**. We used this same method to determine the insertion sites in the haploid and diploid  
20 library by extracting genomic DNA from the pooled libraries. Haploid, diploid and  
21 overlapping insertion sites are evenly distributed throughout the *S. uvarum* genome, as  
22 illustrated in **Supplemental Fig. S1**.



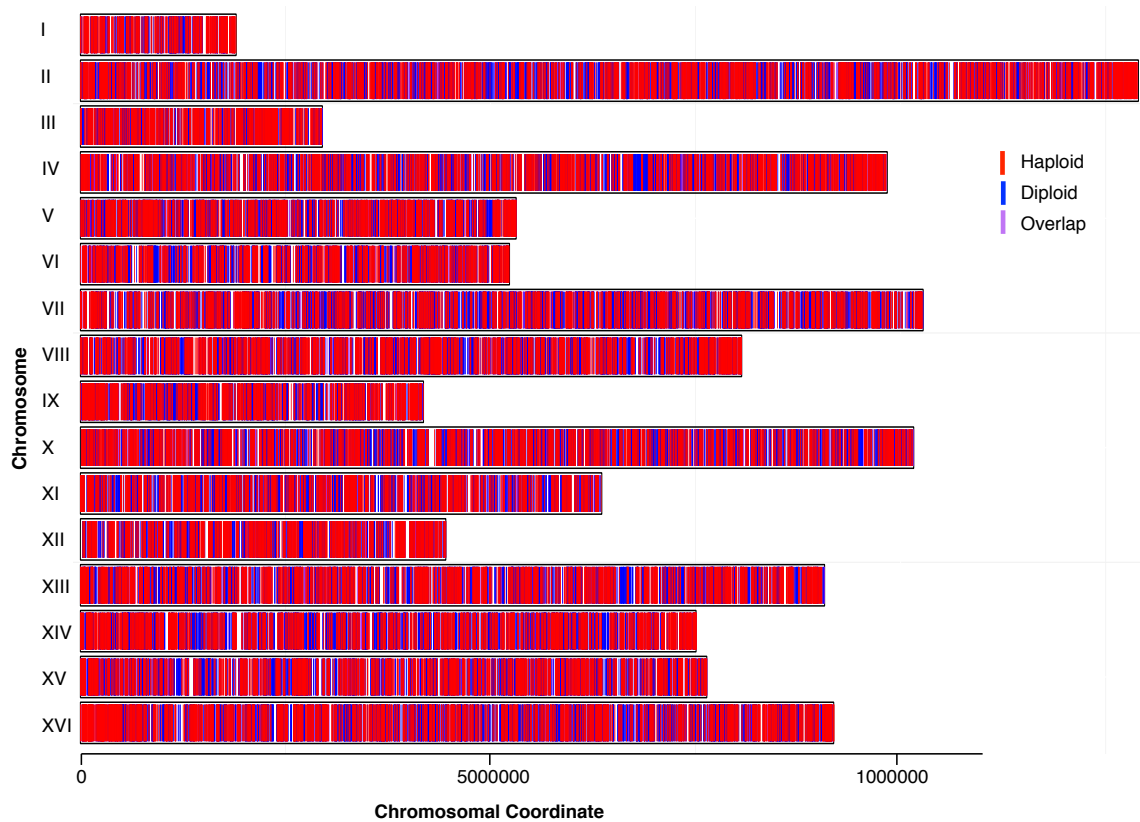

1  
2 **Supplemental Fig. S1. Distribution of haploid and diploid Tn7 insertions across the**  
3 ***S. uvarum* genome.** Chromosomal map of sequenced transposon insertions wherein each  
4 chromosome is represented by a rectangle outlined in black and numbered one through  
5 sixteen from top to bottom. Haploid-only insertion sites are colored red, diploid-only  
6 inserts are blue. Insertion sites that were identified in both libraries are indicated in  
7 purple.

1           Once the insertion sites were determined in all three libraries, we counted the  
2 number of insertion sites in each annotated open reading frame using an in-house Python  
3 script (Materials and Methods). **Supplemental Table S11** summarizes the number of  
4 insertion sites and the number of genes that contain insertion sites within the plasmid,  
5 haploid and diploid libraries. All annotated *S. uvarum* genes containing the number of  
6 insertion sites from each library are fully listed in **Supplemental Table S5**. Of the 5,908  
7 annotated genes, a total of 5,315 (90%) genes harbor insertion sites that were identified in  
8 at least one library. Comparisons between shared genes and unique genes with insertion  
9 sites are illustrated in **Supplemental Fig. S2**. The number of genes with insertion sites  
10 shared amongst all three libraries was 3,657 (69%) of the 5,315 genes summed across the  
11 libraries. There are subsets of genes that are library specific or shared between two  
12 libraries, likely due to differences in overall transformation coverage per library. There is  
13 a subset of 742 genes, however, that is shared only between the diploid and plasmid  
14 libraries (14%). Overall, only 3,933 genes harboring insertion sites were determined in  
15 the haploid pool, suggesting that at least some of the genes falling out of the haploid pool  
16 are likely to be essential based on their dispensability restrictions. We went on to test this  
17 assumption using the known essential gene set in *S. cerevisiae*.

1 **Supplemental Table S11. Summary of library coverage.**

| <b>Library Type</b> | <b>Number of inserts &gt; 10 reads</b> | <b>Number of inserts in ORFs</b> | <b>Number of genes with insert</b> | <b>% Genome covered</b> | <b>Number of orthologs with inserts</b> | <b>% Orthologs with inserts</b> |
|---------------------|----------------------------------------|----------------------------------|------------------------------------|-------------------------|-----------------------------------------|---------------------------------|
| Plasmid             | 54,351                                 | 33,394<br>(61.4%)                | 4,944                              | 83%                     | 4,630                                   | 85%                             |
| Diploid             | 46,326                                 | 27,121<br>(58.5%)                | 4,557                              | 77%                     | 4,283                                   | 79%                             |
| Haploid             | 42,904                                 | 22,988<br>(54.5%)                | 4,190                              | 71%                     | 3,933                                   | 72%                             |

2

## 90% Genome Coverage

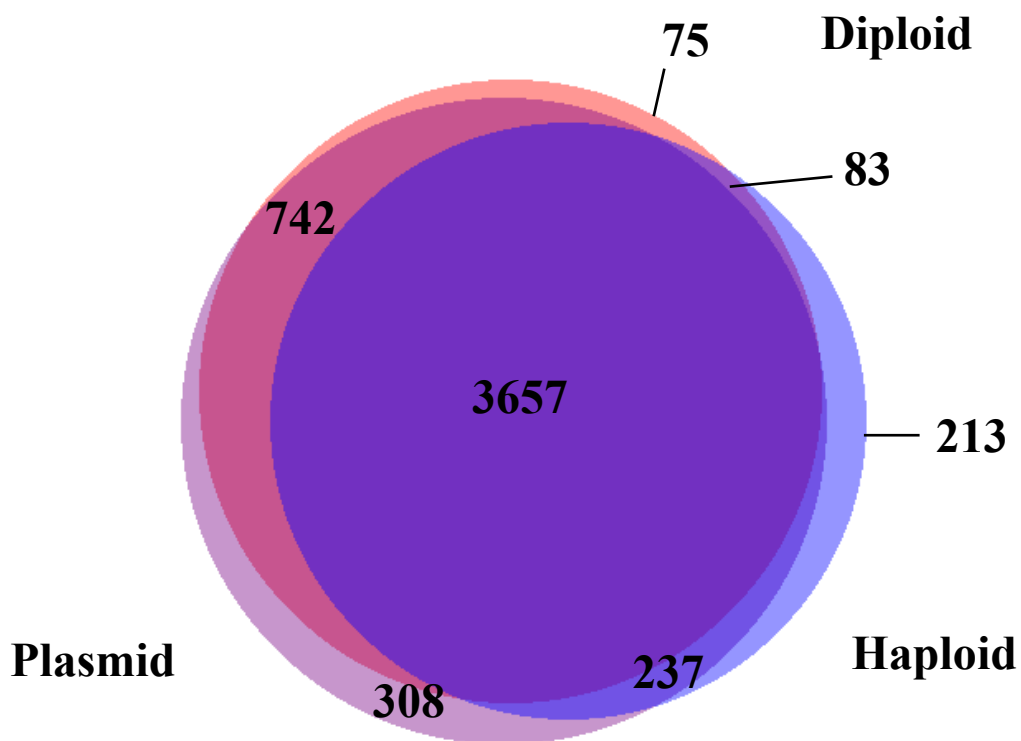

**5315 total genes**

1

2 **Supplemental Fig. 2. Proportional Venn diagram summarizing the number of**  
3 **insert-containing genes identified in each library.** Summary of genes containing at  
4 least one insert sampled by 10 or more sequencing reads. The plasmid library is  
5 represented in purple, the diploid pool in orange and the haploid pool in blue. Non-  
6 overlapping regions represent genes that are library specific.

1 **Known *S. cerevisiae* essential genes contain fewer inserts than known non-essential**  
2 **genes**

3       Although the large number of dropouts suggest that we have identified essential  
4 genes, it is possible that these dropouts just reflect an incomplete library. To test if genes  
5 in the haploid library without (or with minimal) insertion sites were likely to be essential,  
6 we compared the haploid and diploid libraries to determine if differences in the number  
7 of insertions between known essential and non-essential genes exist. Since the  
8 essentiality of most genes is expected to be conserved between *S. cerevisiae* and *S.*  
9 *uvarum*, we used the known essential set in *S. cerevisiae* to test if orthologous genes in  
10 the haploid library contain fewer insertion sites. We normalized the number of inserts  
11 within each gene by the length of the gene (inserts/kb) and plotted the distribution of  
12 normalized inserts within known essential genes and non-essential genes in both diploid  
13 and haploid libraries (**Supplemental Fig. S3A & B**).

14       The distribution between known *S. cerevisiae* essential and non-essential genes is  
15 similar in the diploid pool, with no significant differences between gene types (essential  
16 average inserts/kb=3.8 vs non-essential average inserts/kb = 4.2) (**Supplemental Fig.**  
17 **S3C**, Wilcoxon test p-value = 0.2001). However, the distributions in known *S. cerevisiae*  
18 essential and non-essential genes in the haploid library are significantly different, with  
19 known essential genes averaging fewer normalized inserts per kb (known essential  
20 average inserts/kb=0.88 vs non-essential average inserts/kb = 4) (**Supplemental Fig.**  
21 **S3D**, Wilcoxon test p-value  $<2.2 \times 10^{-16}$ ). This result suggests that the known conserved  
22 essential genes can be predicted from the number of inserts in the haploid library. We  
23 note that known *S. cerevisiae* essential genes in the haploid library harboring several  
24 insertion sites are detected as well. We predict that these genes are candidate *S.*

- 1 *cerevisiae*-specific essential genes, and may not be essential in *S. uvarum*. We explore
- 2 these genes more fully in the following sections.

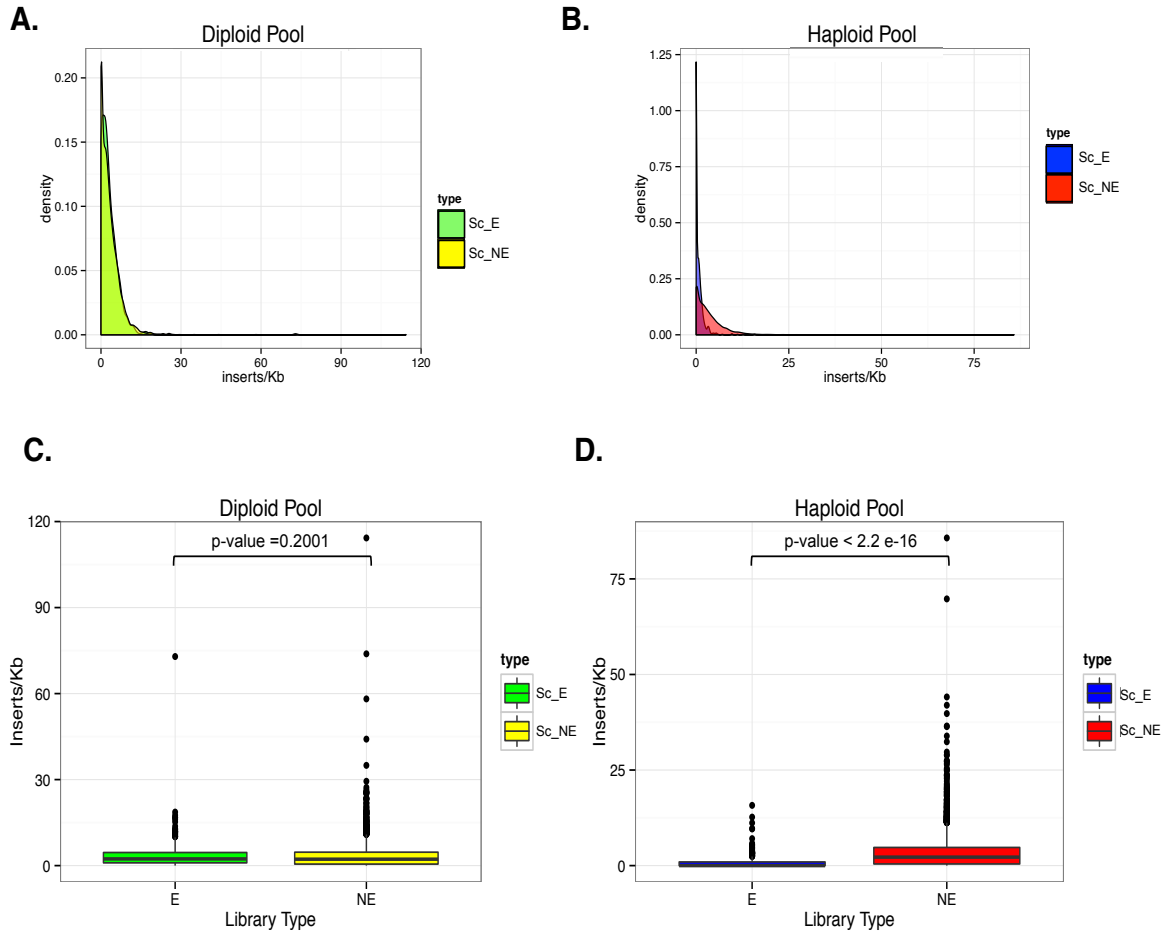

1  
2 **Supplemental Fig. S3. Comparison of insertion distributions between haploid and**  
3 **diploid libraries amongst known *S. cerevisiae* essential and non-essential genes.** A)  
4 Density plot displaying the distribution of the normalized number of insertion sites in  
5 known *S. cerevisiae* essential and non-essential genes within the *S. uvarum* diploid and  
6 B) haploid libraries. C) Box plot of normalized insertions per kb in known *S. cerevisiae*  
7 essential and non-essential genes in the diploid library. No significant difference was  
8 detected between known essential and non-essential genes (Wilcoxon test  $p = 0.2001$ ).  
9 Essential average inserts/kb = 3.8 (SD = 3.98) vs. non-essential average inserts/kb = 4.2  
10 (SD = 4.2). D) Box plot of normalized insertions per kb in known *S. cerevisiae* essential  
11 and non-essential genes in the haploid library displaying a significant difference between  
12 known essential and non-essential genes (Wilcoxon test  $p < 2.2 \times 10^{-16}$ ). Essential  
13 average inserts/kb = 0.88 (SD = 1.28) vs. non-essential average inserts/kb = 4 (SD =  
14 4.38).

1 **Predicting *S. uvarum* essential and non-essential genes using an insertion ratio**  
2 **metric**

3       Once we determined that essential genes contain significantly fewer insertion sites  
4 than non-essential genes in the haploid library, we created a metric for determining a cut  
5 off value to categorize predicted *S. uvarum* essential and non-essential genes. Due to the  
6 nature of the library, insertional events at different positions across a gene may result in a  
7 partial loss of function, meaning that even essential genes may still tolerate some  
8 insertions. Therefore, we relied on comparisons between the diploid and haploid libraries  
9 to make inferences about gene essentiality. Specifically, we calculated an insertion ratio  
10 using the number of inserts per gene in the haploid library divided by the number of  
11 inserts in the diploid library, which inherently normalizes for the length of the gene  
12 (Materials and Methods). Using the insertion ratio as a metric, we tested if significant  
13 differences exist between *S. uvarum* genes whose orthologs are known to be essential and  
14 non-essential in *S. cerevisiae*, as well as *S. uvarum* intergenic regions. Intergenic regions  
15 between convergent orientated genes are expected to not be essential, thus, the  
16 distribution of intergenic regions is expected to be similar to that of non-essential genes  
17 and represents our null distribution.

18       We note the significant difference that also exists between non-essential genes  
19 and intergenic regions and attribute this difference to the possible genes that are  
20 differentially essential between species in this category in comparison to intergenic  
21 regions in *S. uvarum*. We note these differences are of a lesser magnitude than those that  
22 exist between known essential genes. Once we established the intergenic region as  
23 our null distribution, we ranked the insertion ratio value for each gene against the



1 intergenic distribution and determined the proportion of intergenic regions whose  
2 insertion ratio was greater than the insertion ratio of that gene. Using this raking  
3 metric, we set a cut-off value of 0.25 to categorize all annotated *S. uvarum* genes into  
4 essential and non-essential categories. We chose this cut off metric to be more  
5 inclusive than restrictive to be more likely to identify essential genes that are  
6 species specific, despite the likelihood of increasing our false positive rate. A list of  
7 all genes with their predicted classification can be found in **Supplemental**  
8 **Table S7**.

1 **Supplemental Table S12. Validation summary.**

| <b>Predicted gene type</b> | <b>Number of genes tested</b> | <b>Number of genes confirmed</b> | <b>Number of false positives</b> | <b>% Correct</b> |
|----------------------------|-------------------------------|----------------------------------|----------------------------------|------------------|
| ScE_SuE                    | 13                            | 12                               | 1                                | 93%              |
| ScNE_SuNE                  | 3                             | 3                                | 0                                | 100%             |
| ScNE_SuE                   | 28                            | 10                               | 19                               | 32%              |
| ScE_SuNE                   | 24                            | 12                               | 12                               | 50%              |

2

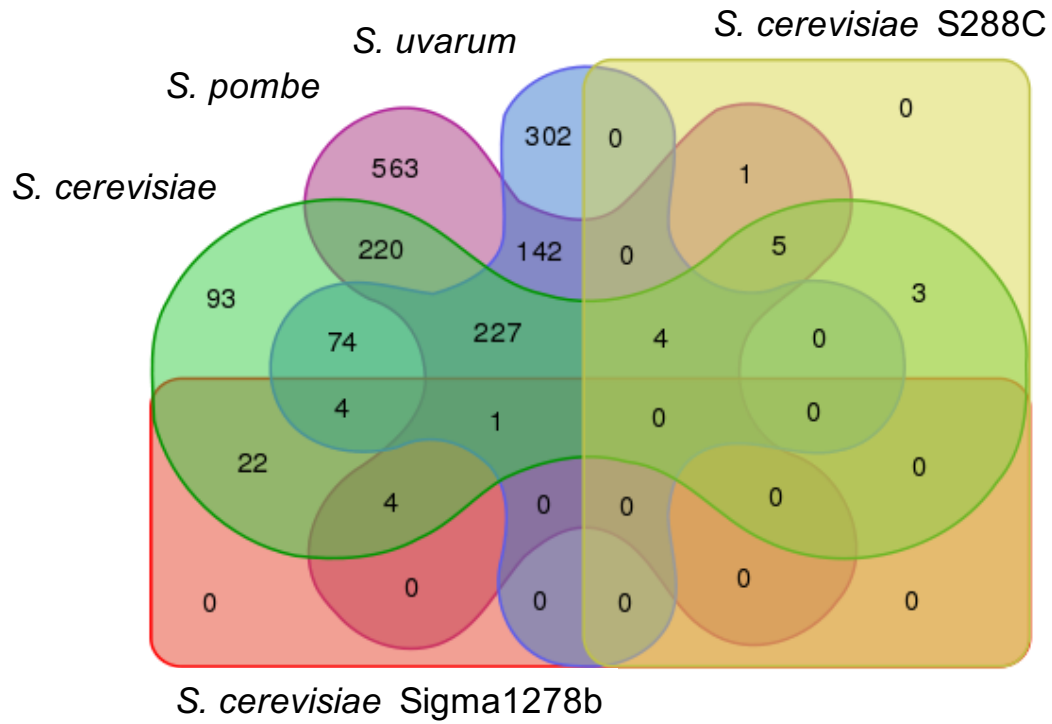

1

2 **Supplemental Fig. S4. Conservation comparison between *S. cerevisiae*, *S. pombe* and**  
 3 **predicted *S. uvarum* essential genes.**

Conserved Essential Genes: ScE:SuE

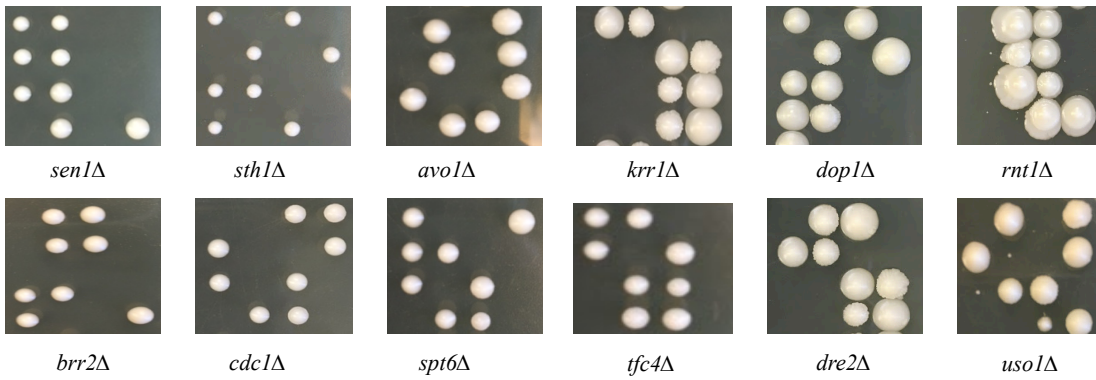

1

2 **Supplemental Fig. S5. Confirmatory tetrad analysis for conserved, predicted**  
3 **essential genes.**

Conserved Nonessential Genes: ScNE:SuNE

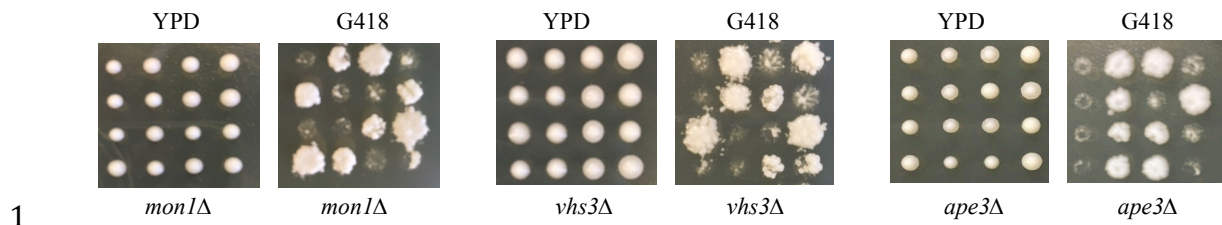

1

2 **Supplemental Fig. S6. Confirmatory tetrad analysis for conserved, predicted non-**

3 **essential genes.**

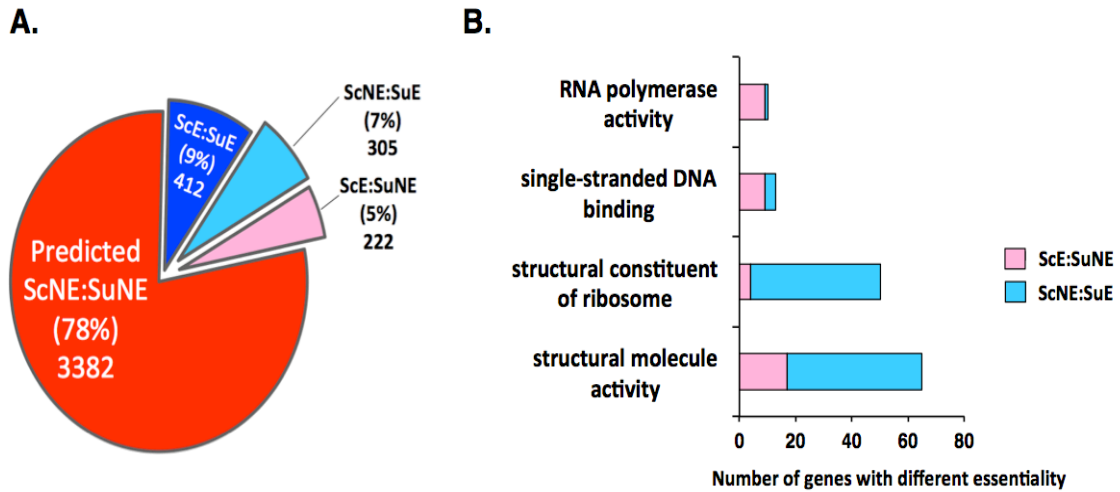

1

2 **Supplemental Fig. S7. Orthologous gene comparisons between species. A)**

3 Essentiality comparisons between 4,321 ortholog pairs between *S. cerevisiae* and *S.*

4 *uvarum*. A total of 85% orthologs display conserved essentiality, with 12% showing

5 differences in gene dispensability (NE = non-essential, E = essential). **B)** Functional

6 enrichment of orthologs with differential essentiality. Gene Ontology (GO) enrichment

7 was performed on genes that differ in essentiality and a subset of biological functions are

8 represented (**Supplemental Table S10** for complete list). Each color indicates the

9 proportion of total annotated genes categorized for each function, split by the number of

10 genes represented by essential genes in each species. The number of predicted *S.*

11 *cerevisiae* essential genes in each functional category is indicated in pink and predicted *S.*

12 *uvarum* essential genes in light blue, where one out of six genes tested for the functional

13 category of the structural constituent of the ribosome was validated (*RSM22*).

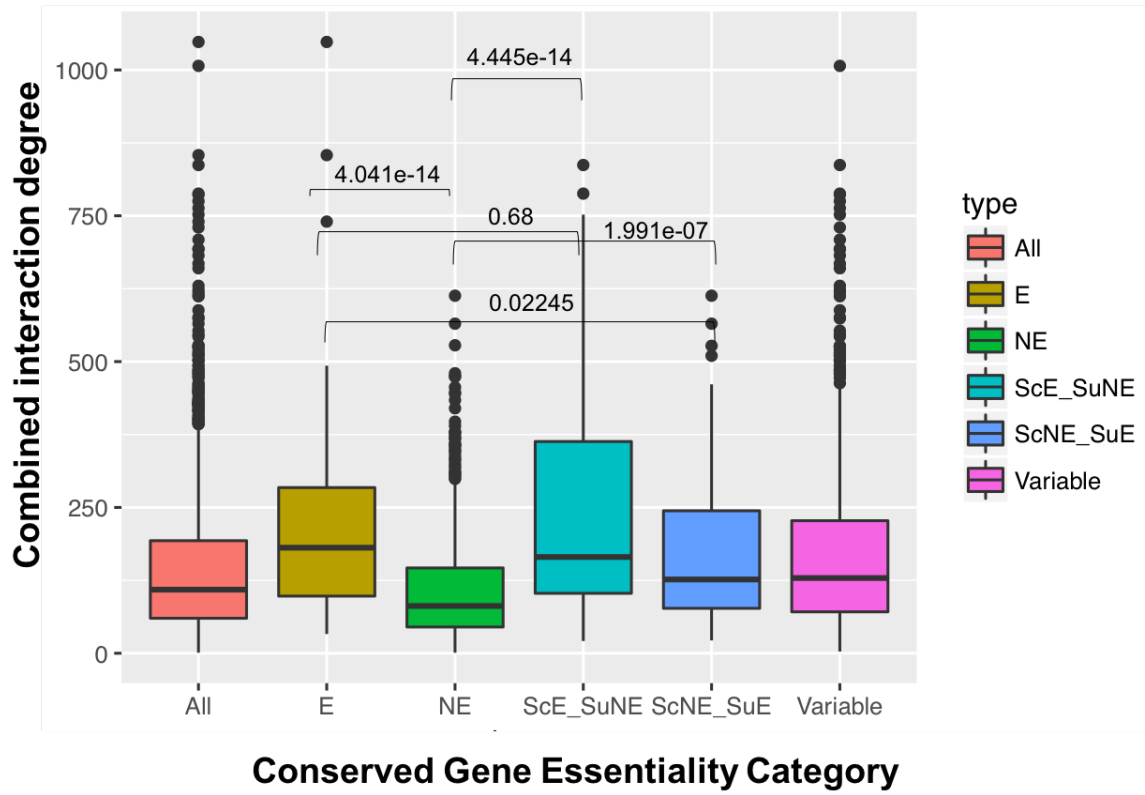

1

2 **Supplemental Fig. S8. Network analysis of conserved essential genes across diverged**  
 3 **species.**

*S. uvarum* Specific Essential Genes:

| Gene            | <i>S. uvarum</i> Tetrads YPD                                                        | <i>S. cerevisiae</i> Tetrads YPD                                                     | <i>S. cerevisiae</i> Tetrads G418                                                     |
|-----------------|-------------------------------------------------------------------------------------|--------------------------------------------------------------------------------------|---------------------------------------------------------------------------------------|
| <i>kap104</i> Δ |    |    |    |
| <i>ssq1</i> Δ   |    |    |    |
| <i>tup1</i> Δ   |    |    |    |
| <i>aro7</i> Δ   |    |    |    |
| <i>mdm10</i> Δ  |    |    |    |
| <i>sac3</i> Δ   |   |   |   |
| <i>ccm1</i> Δ   |  |  |  |
| <i>vma5</i> Δ   |  |  |  |
| <i>aft1</i> Δ   |  |  |  |
| <i>rsm22</i> Δ  |  |  |  |

1

2 **Supplemental Fig. S9. Confirmatory tetrad analysis for predicted *S. uvarum*-specific**  
 3 **essential genes.**



*S. cerevisiae* Specific Essential Genes:

| Gene              | <i>S. cerevisiae</i> Tetrads YPD                                                    | <i>S. uvarum</i> Tetrads YPD                                                         | <i>S. uvarum</i> Tetrads G418                                                         |
|-------------------|-------------------------------------------------------------------------------------|--------------------------------------------------------------------------------------|---------------------------------------------------------------------------------------|
| <i>cdc25Δ</i>     |    |    |    |
| <i>sec24Δ</i>     |    |    |    |
| <i>mcm10Δ</i>     |    |    |    |
| <i>alr1Δ</i> ch15 |    |    |    |
| <i>alr1Δ</i> ch7  | NA                                                                                  |    |    |
| <i>inn1Δ</i>      |   |   |   |
| <i>vtc4Δ</i>      |  |  |  |
| <i>shr3Δ</i>      |  |  |  |
| <i>tfc3Δ</i>      |  |  |  |
| <i>myo2Δ</i>      |  |  |  |
| <i>net1Δ</i>      |  |  |  |
| <i>mdm1Δ</i>      |  |  |  |
| <i>lcd1Δ</i>      |  |  |  |

- 1 **Supplemental Fig. S10. Confirmed tetrad analysis for predicted *S. cerevisiae*-specific**
- 2 **essential genes.**

Conserved Essential Genes: ScE:SuE

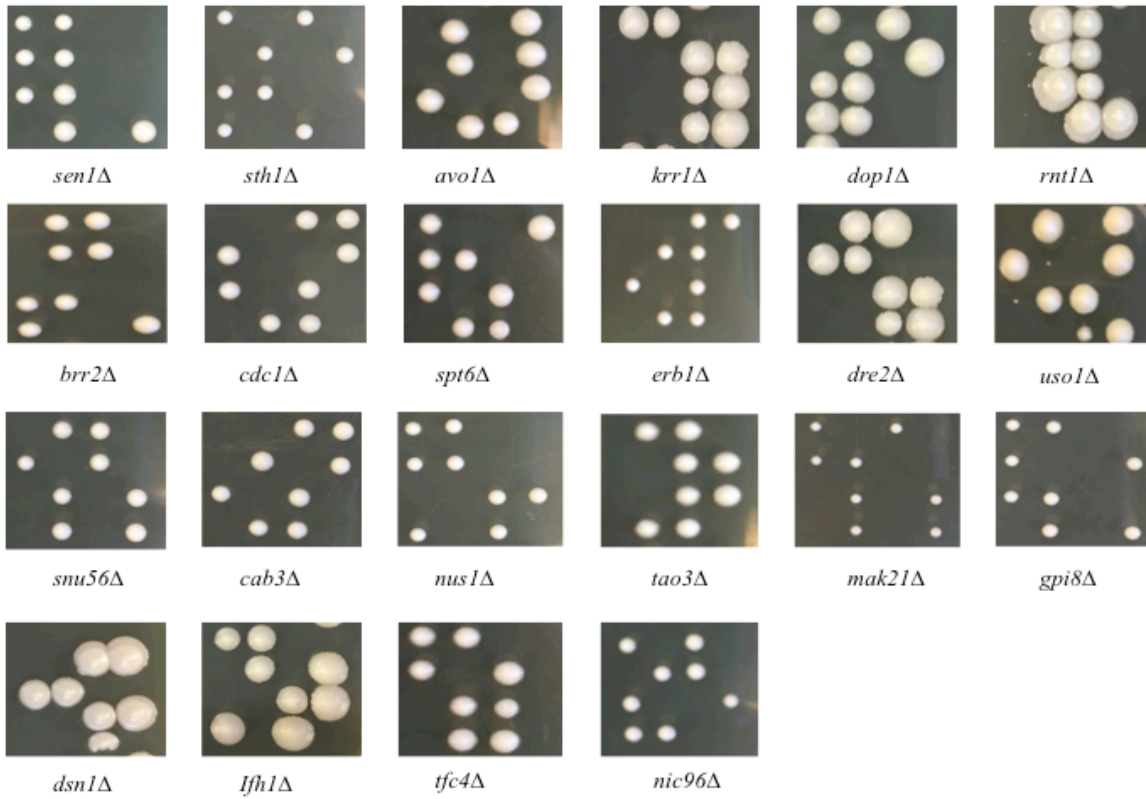

1

2 (Figure continued on next 2 pages.)

Conserved Nonessential Genes: ScNE:SuNE

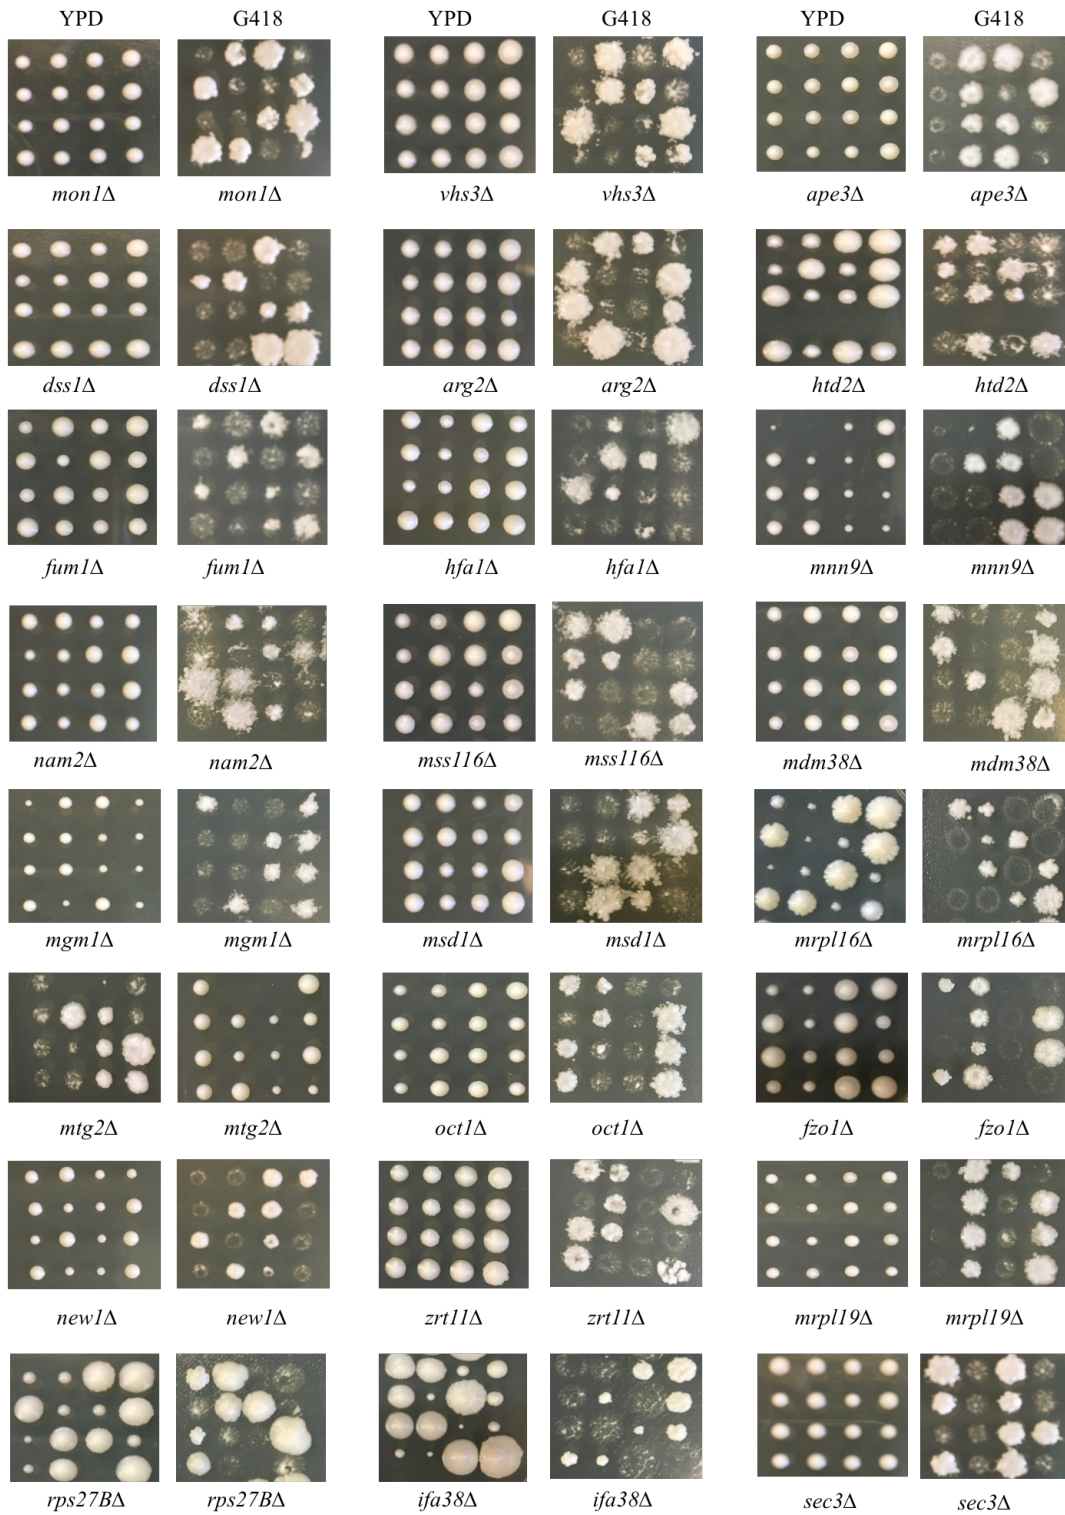

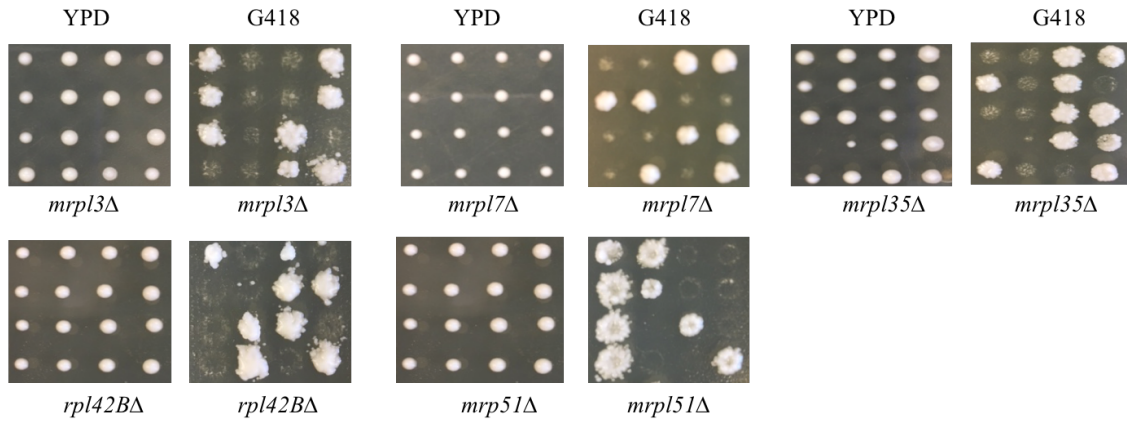

1

2 **Supplemental Fig. S11. Confirmatory tetrad analysis in *S. uvarum* for all conserved**  
 3 **essential and non-essential genes.**

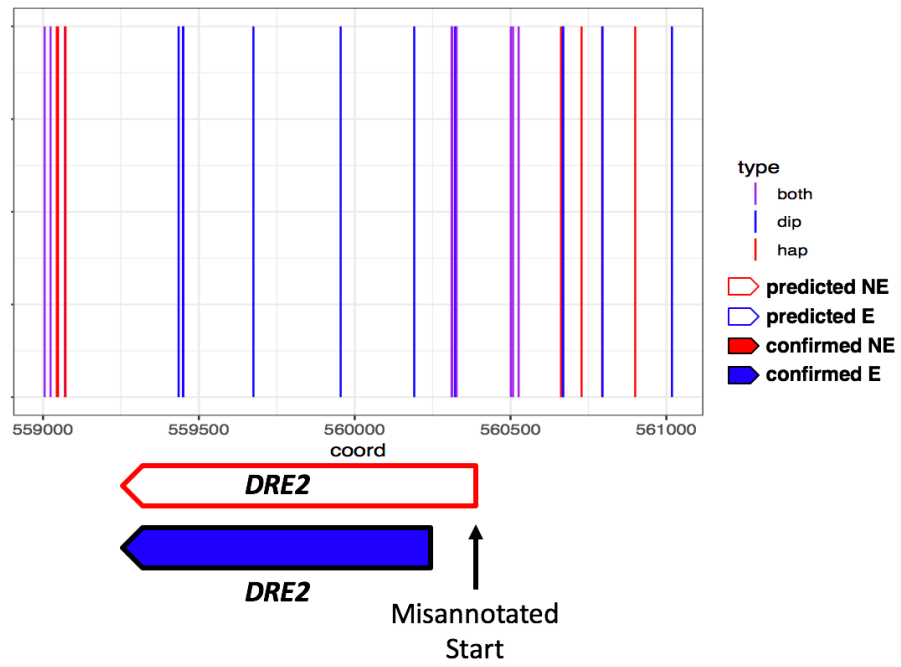

1

2 Supplemental Fig. S12. Incorrect gene annotation of *DRE2*.

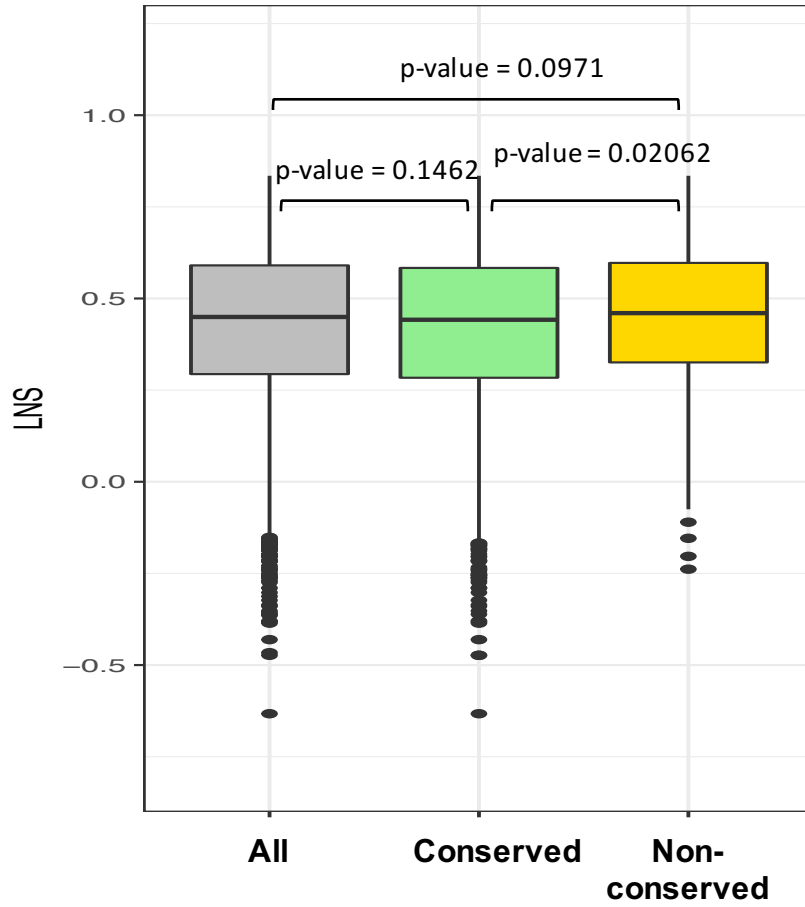

1

2 **Supplemental Fig. S13. Differential gene expression alone cannot explain difference**  
3 **in gene dispensability.**
